# Supplementary material for: Heme Oxygenase-1 Inhibition Potentiates the Effects of Nab-Paclitaxel-Gemcitabine and Modulates the Tumor Microenvironment in Pancreatic Ductal Adenocarcinoma
Source: MDPI journal article supplement (doi:10.3390/cancers13092264), 2021-05-08

Figure 2 D

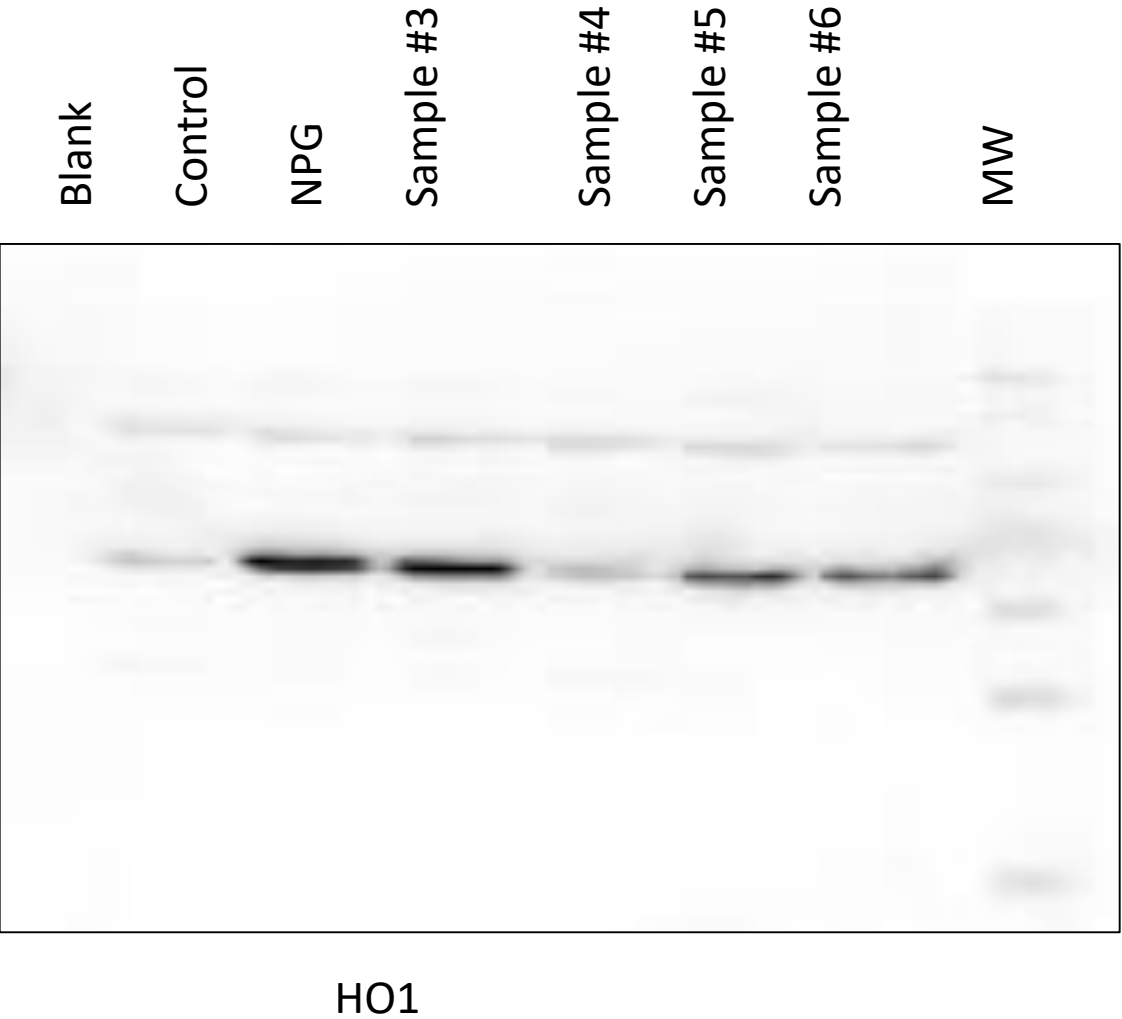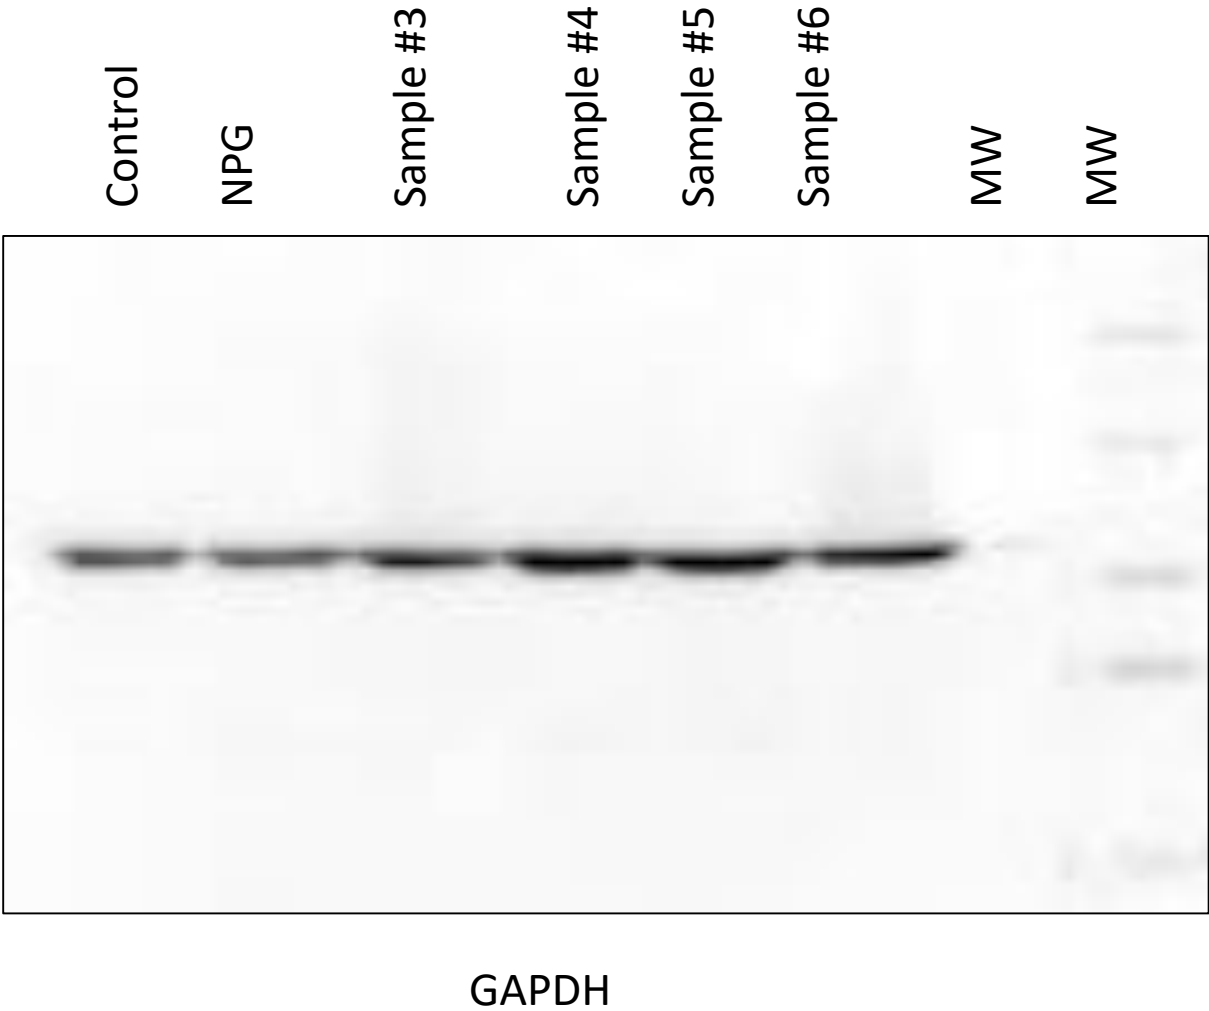

Figure 2 E

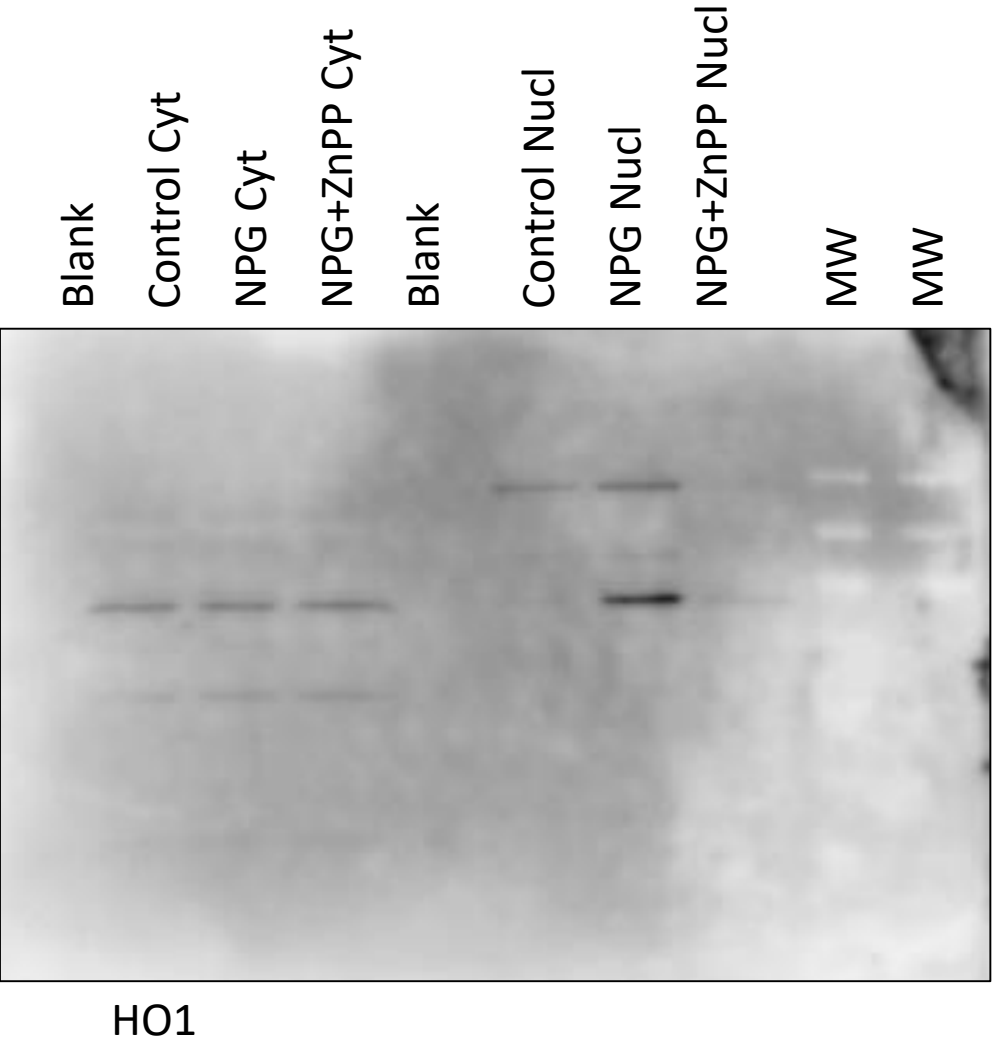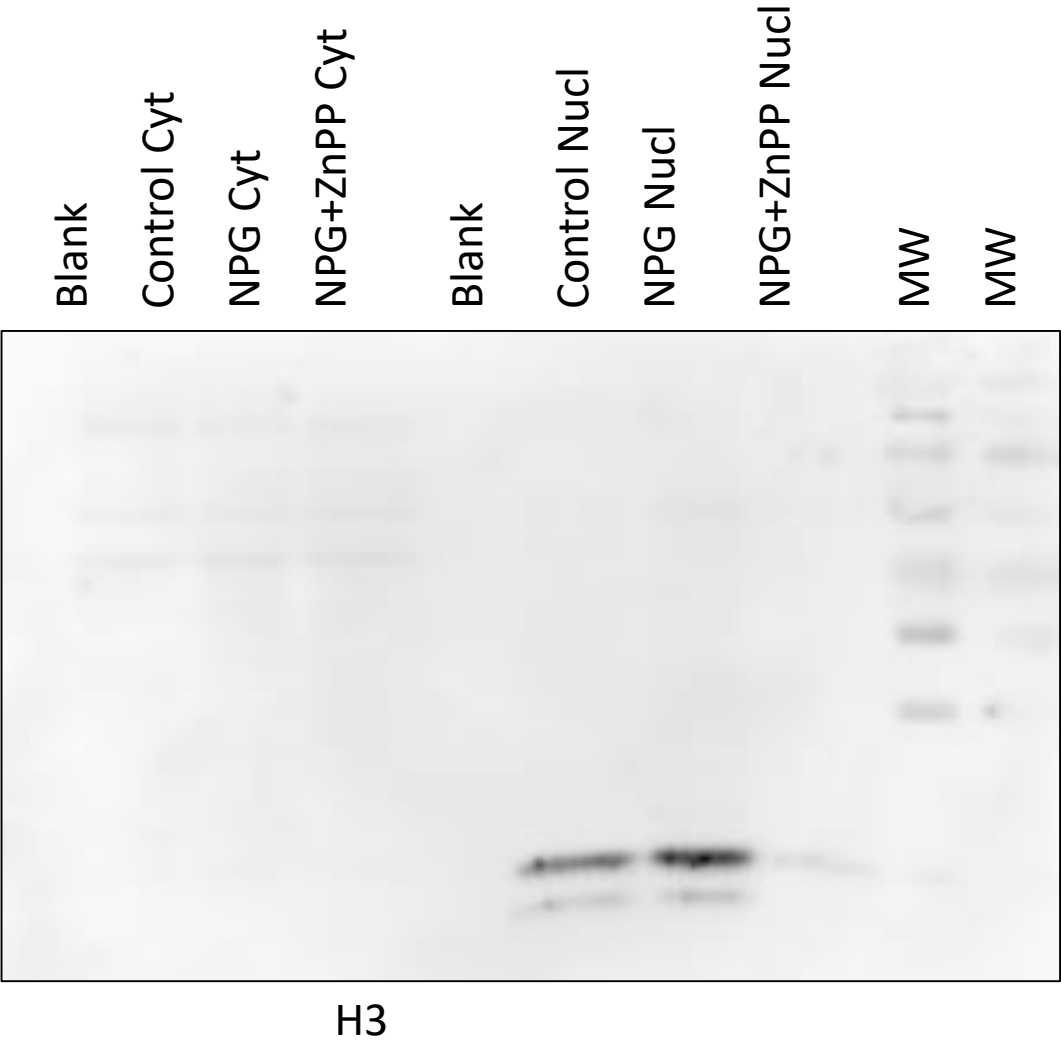

Figure 2 E

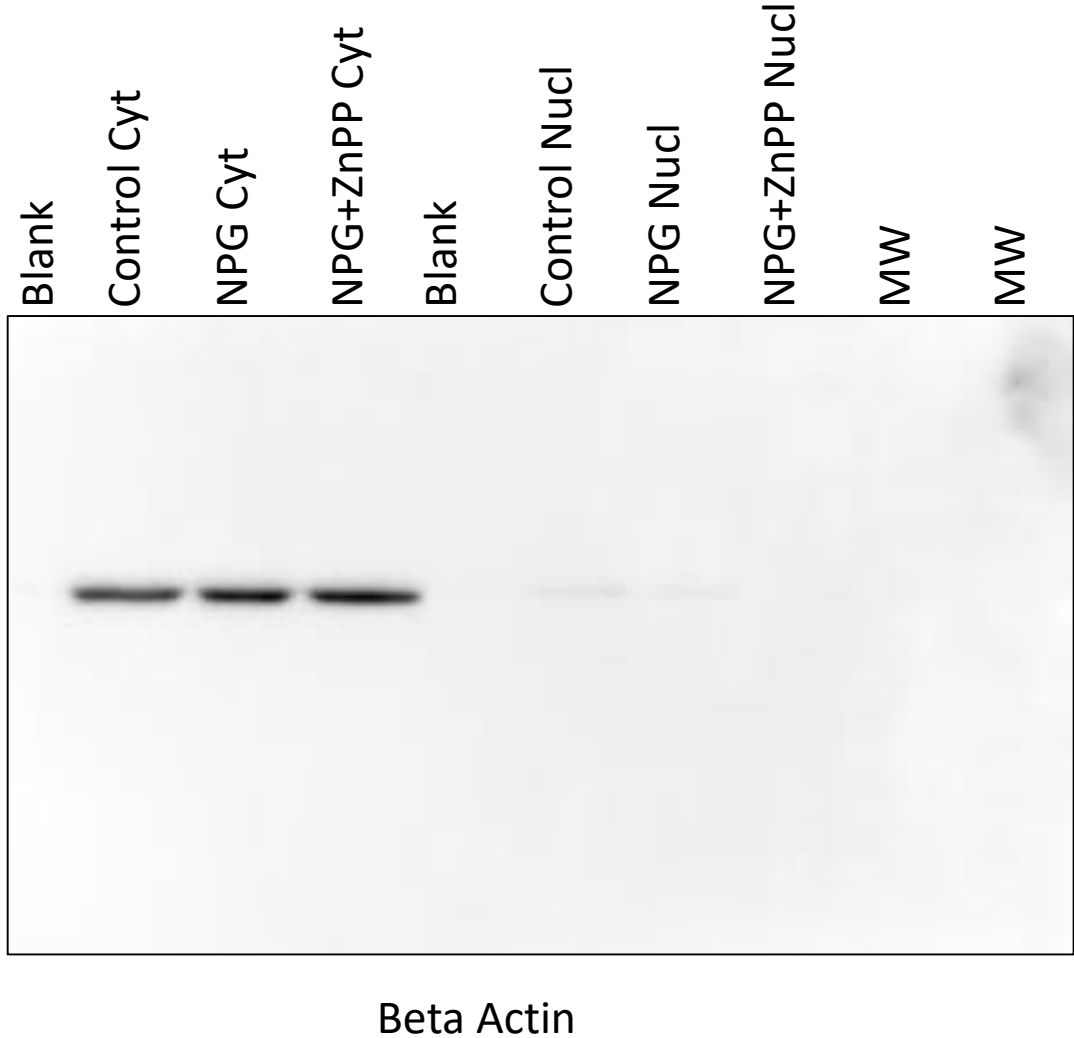

Figure 2 F

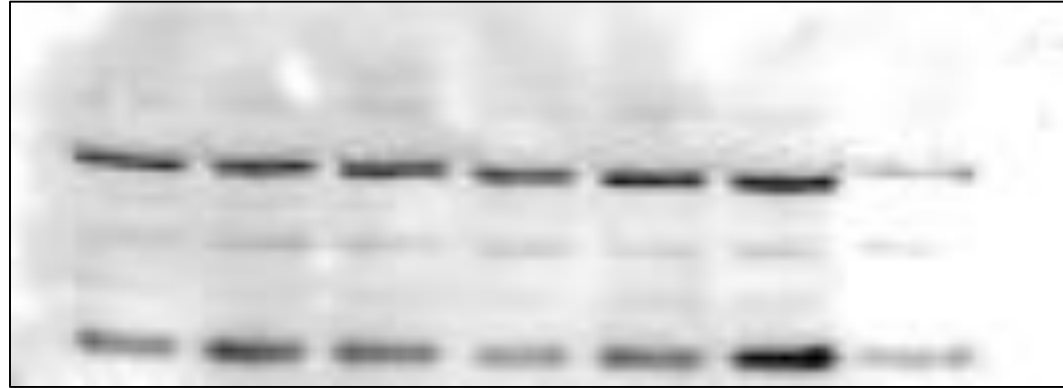

HO1, selected top half

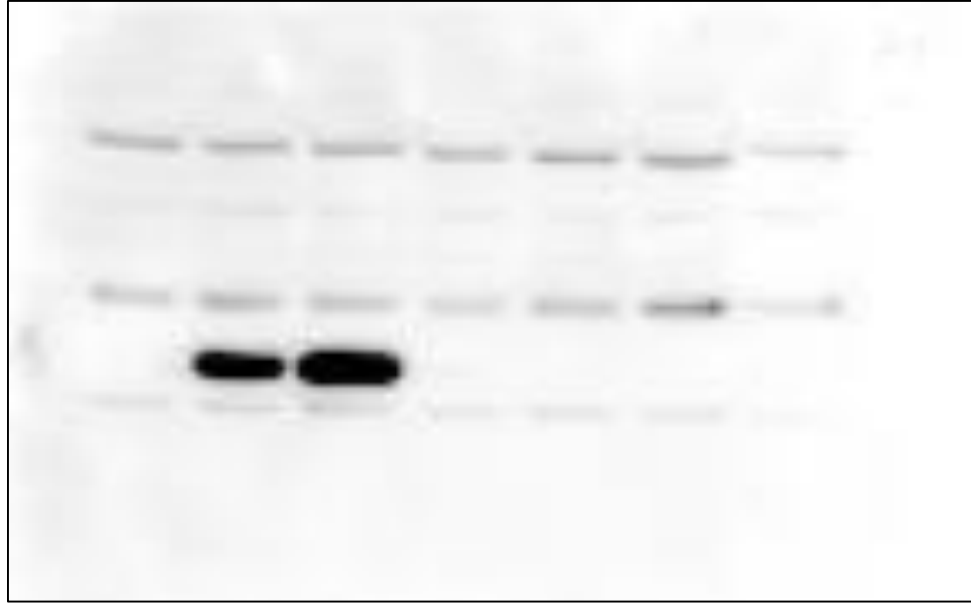

HO1

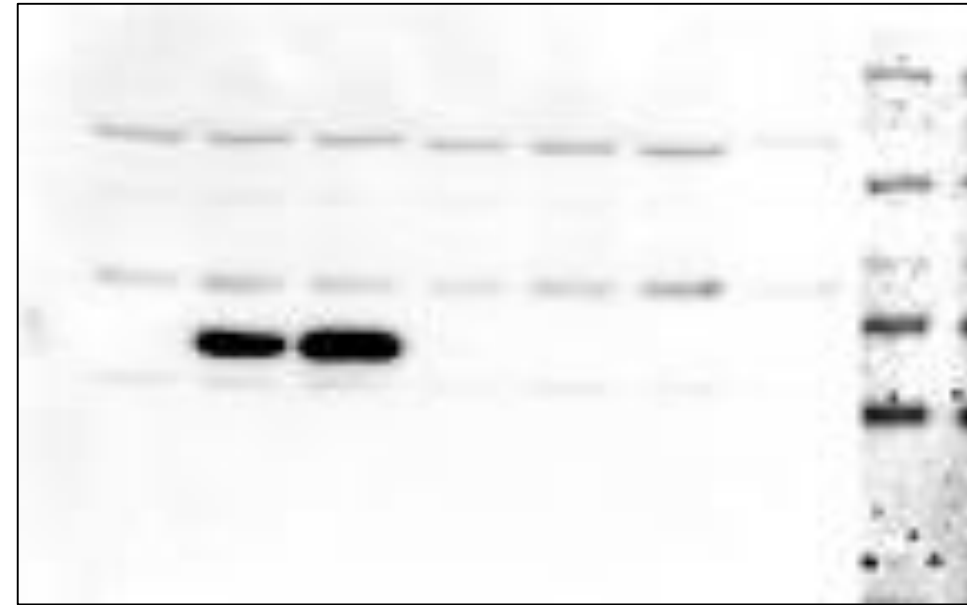

HO1 full-Mwt

Sample #1

Sample #2

Sample #3

SB80

Control

NPG

NPG+SB80

Sample #1

Sample #2

Sample #3

SB80

Control

NPG

NPG+SB80

Sample #1

Sample #2

Sample #3

SB80

Control

NPG

NPG+SB80

MW

Figure 2 F

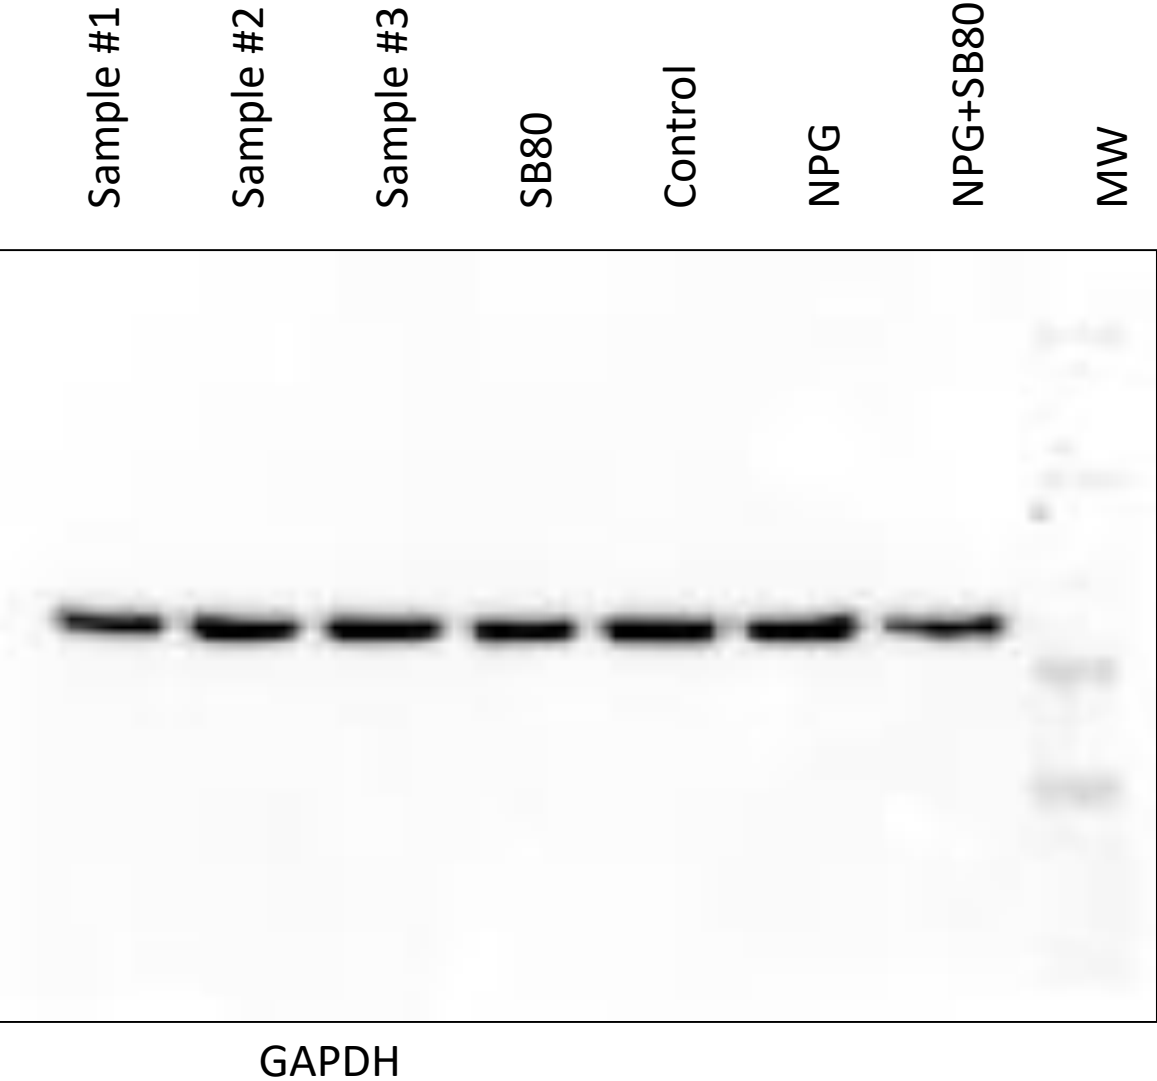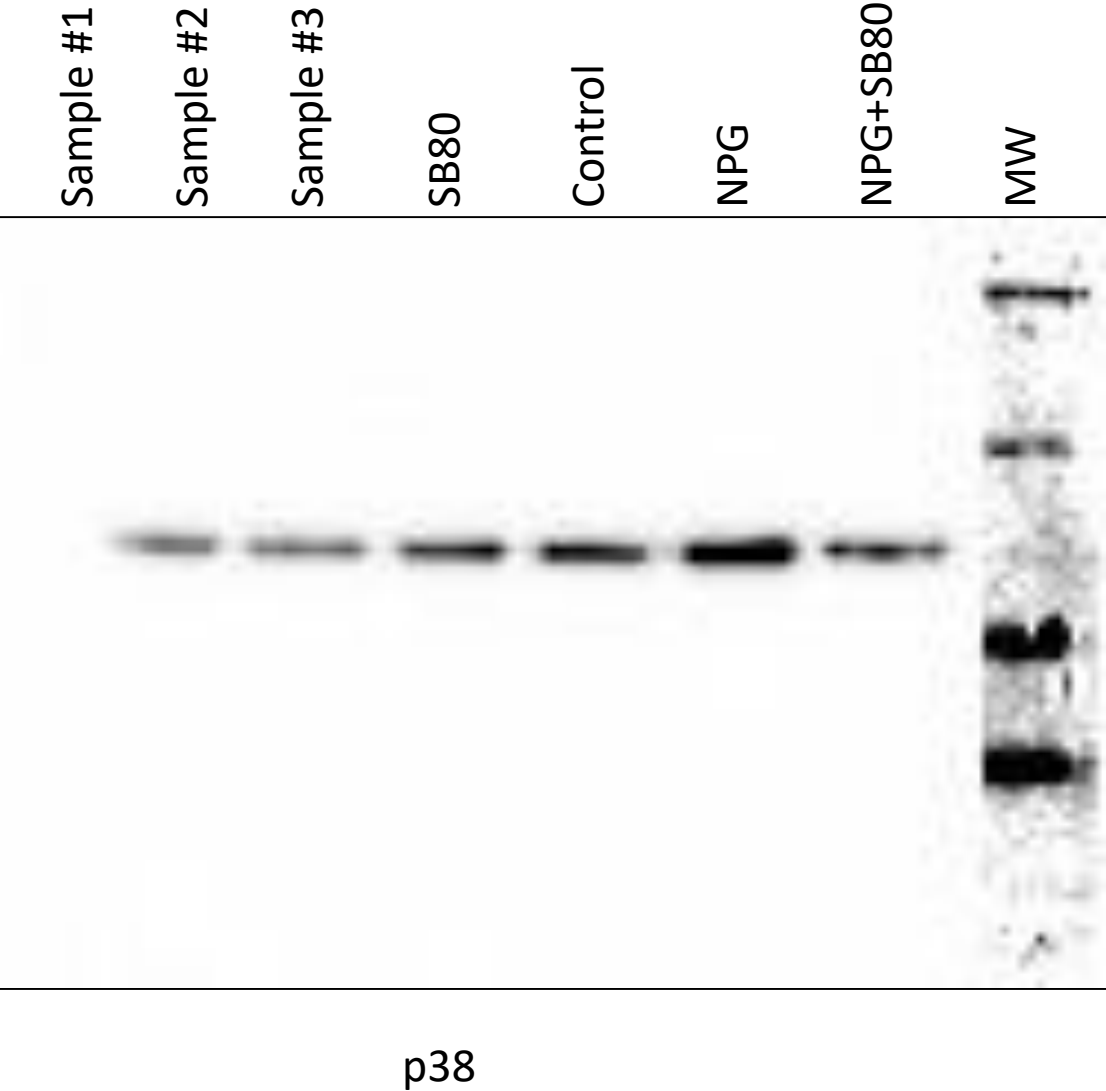

Figure 4

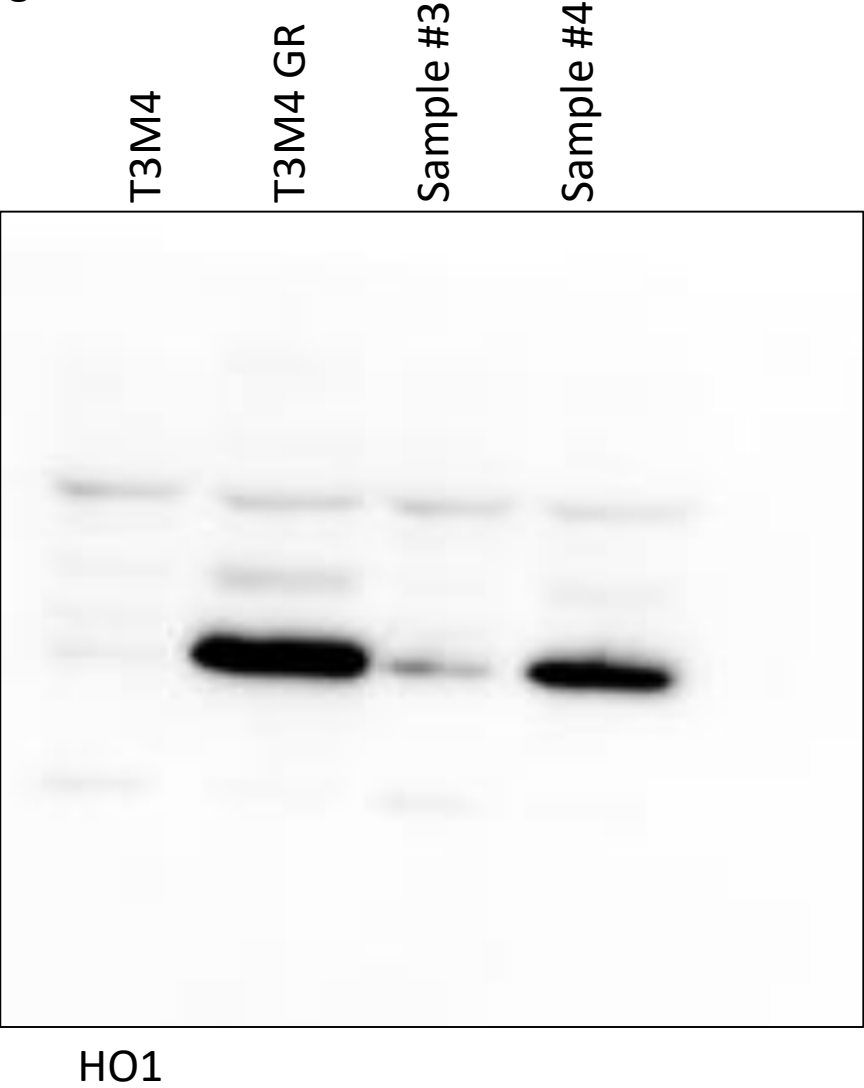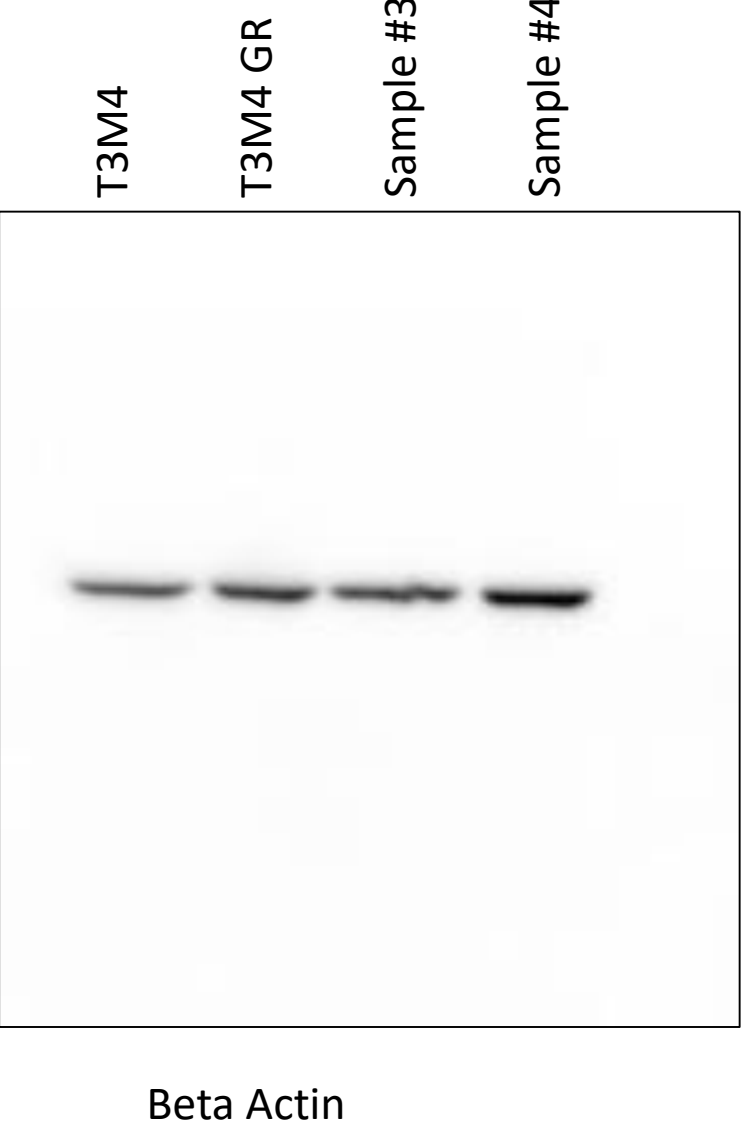

Supplement: s1 [file s1]
